# Supplementary material for: Morphology of human sweat ducts observed by optical coherence tomography and their frequency of resonance in the terahertz frequency region
Source: PubMed Central journal article supplement (PMC4357862; doi:10.1038/srep09071), 2015-03-13
Supplement: srep09071-s1.pdf [file srep09071-s1.pdf]

**Morphology of human sweat ducts observed by optical coherence tomography and their frequency of resonance in the terahertz frequency region**

Saroj R. Tripathi<sup>1\*</sup>, Eisuke Miyata<sup>1</sup>, Paul Ben Ishai<sup>2</sup> and Kodo Kawase<sup>1,3</sup>

<sup>1</sup>Nagoya University, Furo-cho, Chikusa Ku, Nagoya 464-8603, Japan

<sup>2</sup>The Hebrew University of Jerusalem, Givat Ram, Jerusalem 91904, Israel

<sup>3</sup>RIKEN, 519-1399 Aramaki-cho, Aoba, Sendai 980-0845, Japan

\*Corresponding author: tripathi@nuee.nagoya-u.ac.jp

**Variation in duct structural parameters within a single measurement region:**

We used the OCT image of the tip of the right index finger (male, 26 yr) to investigate intra-region variation (one region of one subject). We labelled the ducts A, B, C, D..... O. Figure S1 shows the variation in duct diameter, the RSD value was 8%. Similarly, the variations in duct length and the number of turns in each duct are shown in Figs. S2 and S3. RSDs of 6% and 14% were observed, respectively. We assessed the characteristics of a few representative ducts to avoid the need for a complex calculation.

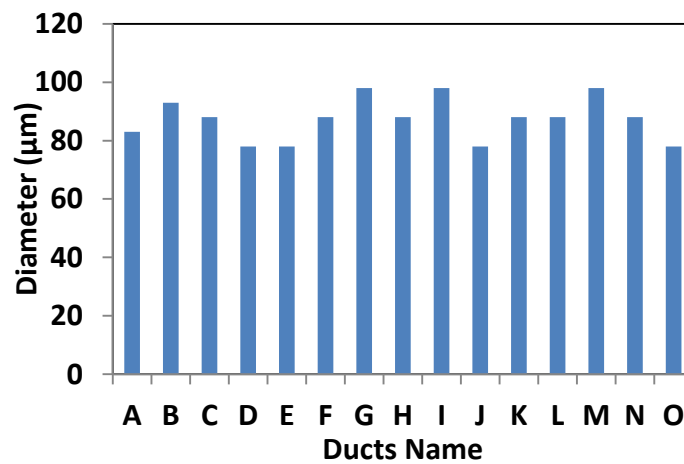

Figure S1: Variation in duct diameter.

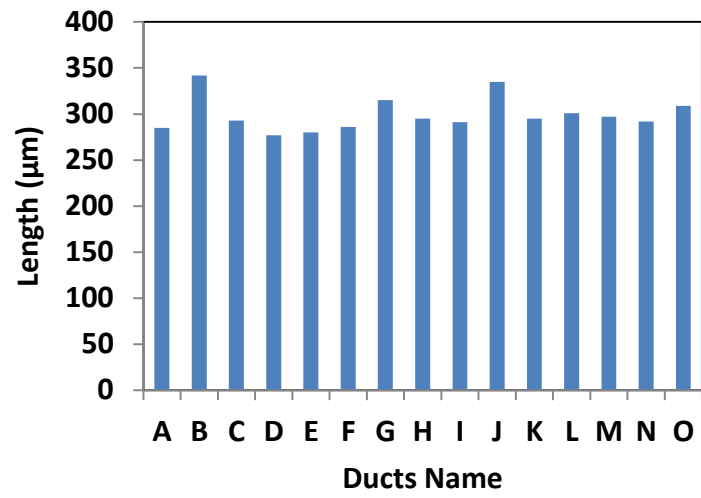

Figure S2: Variation in duct length.

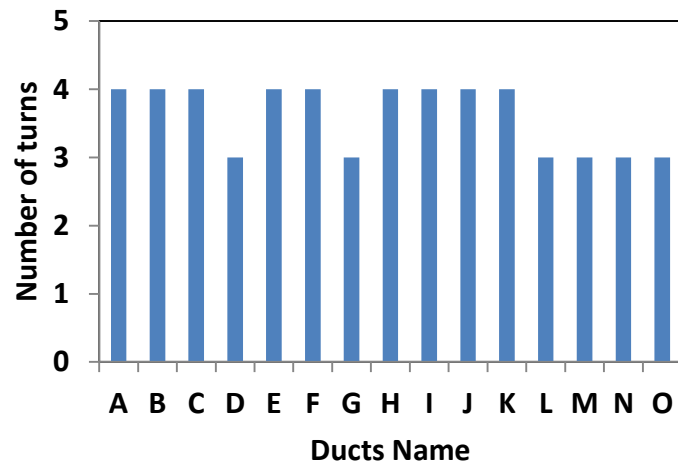

Figure S3: Variation in the number of turns.

**Helical antenna properties:**

Helix geometry is defined by the following structural parameters.

Length of the helix =  $L$

Diameter of the helix =  $D$

Circumference of the helix ( $C$ ) =  $\pi D$

No. of turns in the helix =  $N$

Spacing between the turns ( $S$ ) =  $L/N$

Pitch angle ( $\alpha$ ) =  $\tan^{-1}(S/\pi D)$

Length of the wire between each turn ( $L_0$ ) =  $\sqrt{S^2 + C^2}$

Total helix length ( $L_n$ ) =  $N \times L_0$

We obtained an average duct diameter,  $D = 95 \mu\text{m}$ , no. of turns = 5 and helix length =  $306 \mu\text{m}$  from our OCT measurements. Using the formula above, we computed spacing  $S \approx 61 \mu\text{m}$ , pitch angle  $\alpha \approx 12^\circ$ , length of the wire between each turn  $L_0 \approx 304 \mu\text{m}$  and total helix length  $L_n \approx 1.52 \text{ mm}$ .

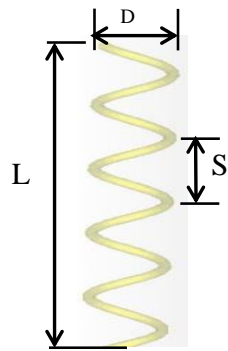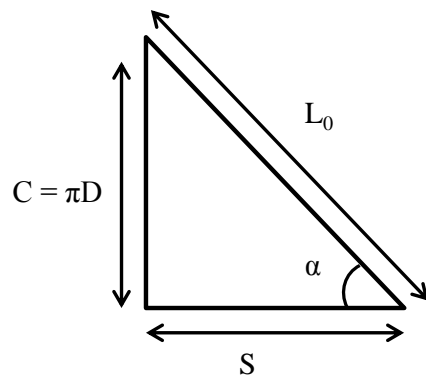

Figure S4: Structural parameters of helix.
